# Supplementary material
Source: PubMed Central journal article supplement (PMC5115350)
Supplement: ADVS-2-0k-s001.pdf [file ADVS-2-0k-s001.pdf]

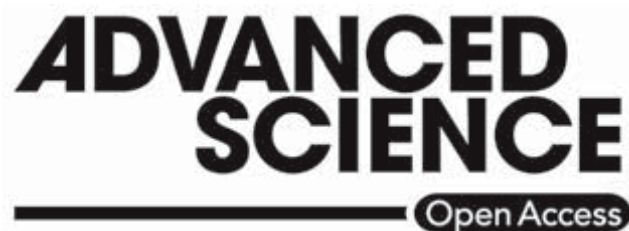

## Supporting Information

for *Adv. Sci.*, DOI: 10.1002/advs.201500005

Crystallinity Engineering of Hematite Nanorods for High-Efficiency Photoelectrochemical Water Splitting

Degao Wang, Yuying Zhang, Cheng Peng,\* Jianqiang Wang, Qing Huang, Shao Su, Lianhui Wang, Wei Huang, and Chunhai Fan\*

## Supporting Information

### Crystallinity engineering of hematite nanorods for high-efficiency photoelectrochemical water splitting

*Degao Wang, Yuying Zhang, Cheng Peng,\* Jianqiang Wang, Qing Huang, Shao Su, Lianhui Wang, Wei Huang, and Chunhai Fan\**

#### Experimental section.

**Materials:** Ferric chloride ( $\text{FeCl}_3 \cdot 6\text{H}_2\text{O}$ ),  $\text{NaNO}_3$  and acetone, anhydrous ethanol were all A.R. grade and purchased from Sinopharm Chemical Reagent Co. Ltd. at Shanghai. All aqueous solutions were prepared with deionized (DI) water from Milli-Q-Water (Millipore Corp, 18.2 M $\Omega$ /cm at 25 °C). Fluorine-doped tin oxide coated glasses (FTO, TEC-15) were purchased from NGS glass, and each piece of FTO glass was cleaned ultrasonically in acetone, pure water and ethanol, respectively. Antimony-doped tin oxide (ATO) nanoparticles with the average particle size of 13-22 nm was purchased from Alfa Aesar. The weight ratio of  $\text{Sb}_2\text{O}_5/\text{SnO}_2$  is 15:85 and the specific surface area of ATO particles is 42-72 m<sup>2</sup>/g.

**ATO modification:** ATO modified FTO (ATO-FTO) conductive substrates was prepared by dropping the ATO/ethanol dispersions (50  $\mu\text{g}/\text{mL}$ ) on the FTO glass with an annealing treatment at 500 °C for 1 h in the air condition.<sup>[1-3]</sup> Then, the vertically aligned  $\beta$ -FeOOH nanorods on the ATO-FTO conductive substrate were prepared via chemical bath deposition (CBD),<sup>[4,5]</sup> and subsequently the hematite nanorods were formed after annealing treatment at 550 °C for 2 h and 800 °C for 14 min, respectively. TEM samples were prepared by scraping the hematite nanorods grown on the ATO/FTO and FTO substrates with a razor blade. The hematite was transferred to a little vial with 1mL ethanol that was placed in a bath sonicator for 20 seconds, followed by pipetting the mixture onto a carbon-coated TEM grid. ATO/ethanol dispersions with different concentration (including 25, 50, 75 and 100  $\mu\text{g}/\text{mL}$ ) were used to adjust the thickness of ATO layer, and the **J-V** curves of these AHN photoanodes were collected under the same condition.

**Characterization:** The morphologies of all samples were characterized by scanning electron microscope (SEM, JME2011, JEOL, Japan) and high-resolution transmission electron microscope (HRTEM, FEI TECNAI G<sup>2</sup> F20). X-ray diffraction spectra (XRD) were carried out with X-ray diffractometer (Bruker AXS, D8 Advanced) using Cu K $\alpha$  radiation ( $\lambda=1.5418$  Å). Electrochemical impedance spectra (EIS) were collected by Autolab electrochemical workstation (Metrohm AG, Switzerland).

**PEC Measurements:** The vertically aligned hematite-nanorod photoanode with a bare portion of FTO substrate was fabricated by soldering with copper wire and all samples were sealed on all edges with epoxy resin except a bare area of 0.2 cm<sup>2</sup> confined by the epoxy for photo excitation. All photoelectrochemical measurements were tested in a three electrode configuration with the Pt counter electrode, the Ag/AgCl reference electrode (BASi) and the working electrode of the photoanode. An aqueous solution of 1.0 M NaOH (pH 13.6) after deaerating with a nitrogen flow was filled in a quartz PEC cell as the electrolyte. A solar simulator (Newport, Model SP 94023A) coupled to a filter (AM 1.5G) using 150 W Xenon lamp was used as the light source. The light power density of 1000 W/m<sup>2</sup> was measured with a power meter (Newport, 91150V). Incident-photon-to-current efficiency (IPCE) spectra were

measured at 1.23 V vs. RHE as a function of the wavelength of the incident light by an electrochemical station (CHI 650b) with a solar simulator (Newport 66902, 500 W xenon lamp), coupled to an aligned monochromator (Newport 74125) and a Si detector (Newport 71675). The exposed area on the samples was confined by epoxy resin at  $0.2 \text{ cm}^2$ , which is far greater than the spot size ( $A_{ph} = 0.1 \text{ mm} \times 0.2 \text{ mm}$ ) of monochromated light. Thus the photocurrent was calculated using the equation below:

$$j_{ph} = \frac{I_{ph} - I_d}{A_{ph}} \quad j_{ph} = \frac{I_{ph} - I_d}{A_{ph}} \quad (1)$$

where  $I_{ph}$  and  $I_d$  was the current tested under chromated light illumination and in the dark, respectively. The intensity of the monochromated light was calibrated using a Si photodetector at zero bias. Thus the IPCE was calculated by using the equation below:<sup>[6]</sup>

$$j_{ph} = \frac{I_{ph} - I_d}{A_{ph}} \quad (2)$$

Where  $j_{phD}$  was the photocurrent from the Si photodetector in  $\text{mA}/\text{cm}^2$ , and  $\eta_{ext}$  was the external quantum efficiency of the Si photodetector.

The electrochemical AC impedance spectroscopy were performed in the dark configuration system in 1.0 M NaOH solution with a sinusoidal perturbation with 50 mV amplitude and frequencies ranging from 100 kHz to 1 Hz. Capacitance values were derived from the impedance-potential and Mott-Schottky plots were generated from the capacitance values. The collected potentials vs. Ag/AgCl were converted to the reversible hydrogen electrode (RHE) scale according to the Nernst equation:

$$E_{RHE} = E_{Ag/AgCl} + 0.059\text{pH} + E_{Ag/AgCl}^0 \quad (3)$$

where  $E_{RHE}$  was the converted potential vs. RHE,  $E_{Ag/AgCl}^0$  was 0.1976 V at 25 °C, and  $E_{Ag/AgCl}$  was the experimental potential against the Ag/AgCl reference. Since the solution pH value was 13.6, the  $E_{Ag/AgCl}$  could be converted to  $E_{RHE}$  according to the following equation:

$$E_{RHE} = E_{Ag/AgCl} + 1 \quad (4)$$

The carrier densities were calculated from the slope of Mott-Schottky plot by the following equation:

$$\left(\frac{1}{C}\right)^2 = \left(\frac{2}{e_0 \epsilon_0 \epsilon N_d}\right) \left(E - E_{FB} - \frac{kT}{e_0}\right) \quad (5)$$

where  $C$  was capacitance ( $\text{F}/\text{cm}^2$ ),  $e_0$  was the electron charge,  $\epsilon$  was the hematite dielectric constant of 80,  $\epsilon_0$  was the permittivity of vacuum,  $N_d$  was the carrier density,  $E$  was the electrode applied potential,  $E_{FB}$  was the flatband potential,  $k$  was the Boltzmann's constant and  $T$  was the temperature.

#### References

[1] D. G. Wang, Y. Y. Zhang, J. Q. Wang, C. Peng, Q. Huang, S. Su, L. H. Wang, W.

Huang, C. H. Fan, *ACS Appl. Mater. Interfaces* **2014**, *6*, 36.

[2] J. Moir, N. Soheilnia, P. O'Brien, A. Jelle, C. M. Grozea, D. Faulkner, M. G.

Helander, G. A. Ozin, *ACS Nano* **2013**, *7*, 4261.

[3] Q. Peng, B. Kalanyan, P. Hoertz, A. Miller, D. H. Kim, K. Hanson, L. Alibabaei, J.

Liu, T. J. Meyer, G. N. Parsons, J. T. Glass, *Nano Lett.*, **2013**, *13*, 1481–1488.

[4] P. Wang, D. G. Wang, J. Lin, X. L. Li, C. Peng, X. Y. Gao, Q. Huang, J. Q. Wang, H. J.

Xu, C. H. Fan, *ACS Appl. Mater. Interfaces* **2012**, *4*, 2295.

[5] L. Vayssieres, A. Hagfeldt, S. E. Lindquist, *Pure Appl. Chem.* **2000**, 72, 47.

[6] K. Sun, X. L. Pang, S. H. Shen, X. Q. Qian, J. S. Cheung, D. L. Wang, *Nano Lett.* **2013**, 13, 2064.

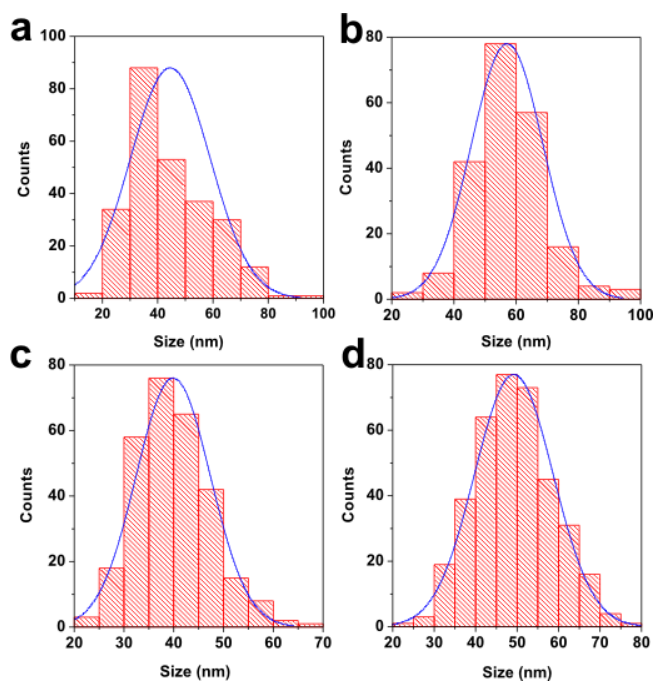

**Figure S1.** The main diameter distribution of HN (a, b) and AHN (c, d) before and after HTA at 800 °C.

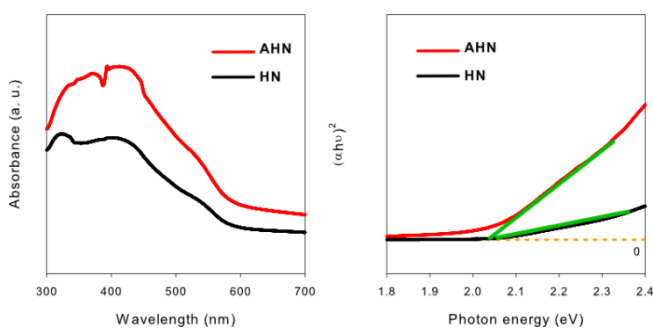

**Figure S2.** UV-vis absorption spectra (a) and Tauc plots for the indirect case (b) and the direct case (c) of HN and AHN.

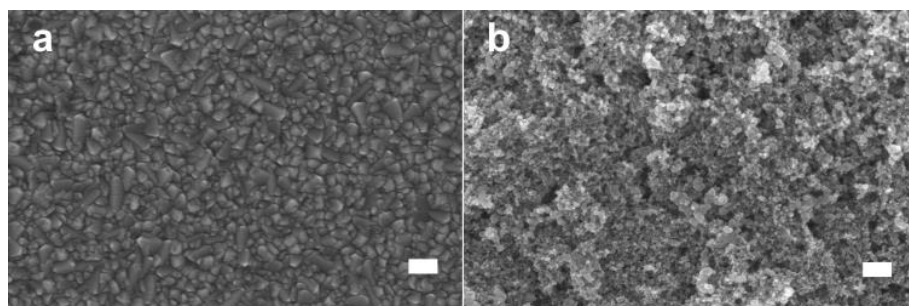

**Figure S3.** The SEM image of ATO modified FTO substrate (a) and bare FTO substrate (b), the scale bar is 200 nm.

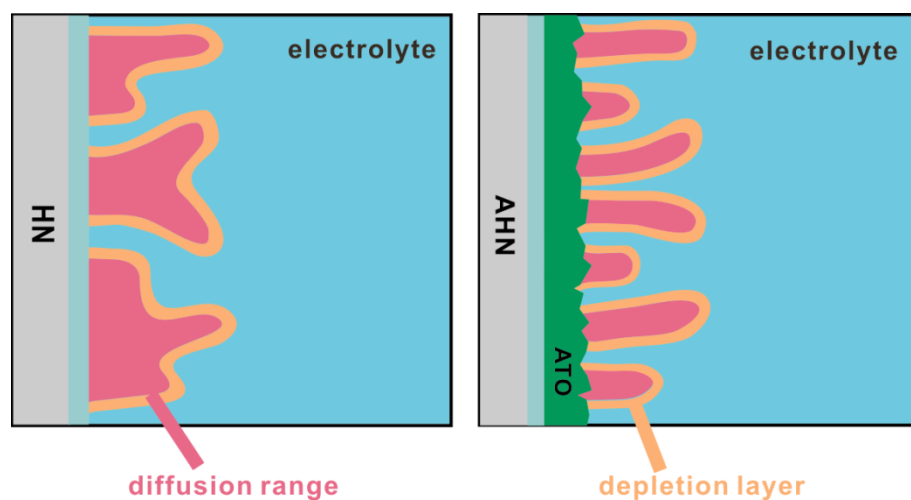

**Figure S4.** Illustration of charge separation and transport at the electrode/electrolyte interface of AHN and HN, respectively.

**Table S1.** Lattice parameters of non-annealed hematite nanorods on AHN and HN.

|            | lattice parameters (Å) |         | Fe-O bond distances (Å) |           | Lattice energy (kJ mol <sup>-1</sup> ) | Refinement reliability parameters |      |
|------------|------------------------|---------|-------------------------|-----------|----------------------------------------|-----------------------------------|------|
|            | a-b                    | c       | short bond              | long bond |                                        | Sig                               | Rw % |
| HN 550 °C  | 5.1110                 | 13.9089 | 1.9724                  | 2.1419    | 14595.41                               | 1.30                              | 3.85 |
| AHN 550 °C | 5.0434                 | 13.7616 | 1.9210                  | 2.1588    | 14693.35                               | 1.37                              | 4.20 |
